# Supplementary material
Source: PubMed Central journal article supplement (PMC10423642)
Supplement: NIHMS165452-supplement-Supp_Info.pdf [file NIHMS165452-supplement-Supp_Info.pdf]

## Supplementary Materials and Methods

**Construction of the *Acidovorax* sp. JS42 *ntdAc* mutant.** Plasmid pDTG850, which carries the *ntd* operon, was digested with KpnI, which cuts once within the *ntdAc* gene, and blunt ends were generated with T4 polymerase (Maniatis *et al.*, 1982). The 1.3-kb kanamycin resistance gene from Tn903 (Oka *et al.*, 1981) was ligated with linearized pDTG850 to form pDTG850-Km. The SacI-EcoRI fragment from pDTG850-Km was introduced into pRK415, and the resulting plasmid, pRK415-850-Km, was introduced into JS42 by mating from S17-1. A kanamycin-resistant tetracycline-sensitive strain that was unable to grow on 2-nitrotoluene was designated JS42Ac. This strain did not have 2NTDO activity, but retained catechol 2,3-dioxygenase activity (assayed as described previously (Bayly *et al.*, 1966)), and was able to grow on catechol, 3-methylcatechol, and 4-methylcatechol (data not shown). The insertion was verified by PCR amplification of the *AcAd* genes with the nitroAc and nitroAd primers (Table S9). A larger fragment (by approximately 1 kb) was obtained from the mutant strain compared to the wild type (data not shown). For complementation, plasmid pKSJ44 was constructed by subcloning the 4.7-kb SacI-fragment containing the *ntdAaAbAcAd* gene cluster from pDTG800 into SacI-digested pBBR1MCS5. When introduced into JS42Ac, pKSJ44 allowed growth on 2-nitrotoluene and 2NTDO activity was restored (data not shown).

**Construction of the *Acidovorax* sp. JS42 catechol 2,3-dioxygenase mutant.** The 4.5-kb KpnI-BamHI fragment from pDTG903 (Parales *et al.*, 1997) carrying *cdoE* from *Comamonas* sp. JS765 (which is identical in sequence to the catechol dioxygenase gene *ctdE1* in JS42) was inserted into KpnI-BamHI-digested pK18 (Pridmore, 1987) to generate pDTG928. The streptomycin resistance cassette was excised from pHP45 $\Omega$  (Prentki and Krisch, 1984) using SmaI and inserted into the unique ScaI site within *cdoE* on pDTG928, generating pDTG929. The inactivated *cdoE* gene fragment (~6 kb) was excised from pDTG929 using XbaI and KpnI and inserted into XbaI-KpnI-digested pRK415 (Keen *et al.*, 1988) to form pDTG930. pDTG930 was introduced into *Acidovorax* sp. JS42 by conjugative transfer from *E. coli* S17-1 as described above. The insertion of the  $\Omega$  cassette into the genomic DNA of this strain (JS42E1) was confirmed by Southern hybridization with the *cdoE* gene as the probe (data not shown). As expected, this strain did not grow with 2-nitrotoluene. Catechol 2,3-dioxygenase assays (Bayly *et al.*, 1966) were carried out with crude cell extracts of wild-type JS42 and JS42E1 and catechol or 3-methylcatechol as substrates. Unlike wild type, JS42E1 did not have detectable catechol 2,3-dioxygenase activity with either substrate (data not shown). For complementation, the *ctdE1* gene was amplified by PCR from JS42 genomic DNA using primers ctdE1F and ctdE1R (Table S9). The ~1-kb product was purified, digested with HindIII and XbaI, and ligated with similarly digested pUC18, to produce pKSJ113. After sequence verification, the HindIII-XbaI fragment containing *ctdE1* was ligated with pBBR1MCS2 digested with the same enzymes. The resulting clone, pKSJ126, when introduced into JS42E1 by conjugative matings from S17-1, restored catechol 2,3-dioxygenase activity and the ability to grow on 2-nitrotoluene.

**Introduction of *ntdA-lacZ* into JS42 catabolic mutants.** *E. coli* S17-1 (pDTG931) was mated with JS42Ac and JS42E1 as described above. Gentamicin-resistant colonies were selected and screened for blue color when grown on plates containing 5-bromo-4-chloro-3-indolyl- $\beta$ -D-galactopyranoside (X-Gal). The resulting strains were designated as JS42Ac-1 and JS42E1-1.

**Construction of NagR and NtdR mutants.** The site-directed mutagenesis procedure of Adereth et al. (Adereth *et al.*, 2005) was used to create the following NtdR and NagR mutants (plasmids listed in Table 3; primers in Table S9): NagR H169L (pJVP2), NagR K189R (pJVP3), NagR P227S (pJVP4), NagR I232V (pJVP5), NtdR L169H (pJVP8), NtdR R189K (pJVP9), NtdR S227P (pJVP10), NtdR V232I (pJVP11). Each mutated DNA fragment was blunt-end ligated to *Sma*I-digested pBBR1MCS and used to transform competent *E. coli* cells (DH5 $\alpha$  or S17-1). The *Cla*I/*Sna*BI DNA fragments of pJVP2 and pJVP8 were exchanged to produce NagR I74V (pJVP1) and NtdR V74I (pJVP7) mutants. The *Sna*BI/*Sac*II DNA fragments of pJVP3 and pJVP9 were exchanged to create the double mutants NagR P227S I233V (pJVP6) and NtdR S227P V233I (pJVP12). Exchange of the *Sna*BI/*Xba*I fragments between pNtd1 and pNag1 produced the triple mutants NagR K189R P227S I232V (pKSJ33) and NtdR R189K S227P V232I (pKSJ34). All mutations were confirmed by diagnostic restriction digestions and sequencing of both DNA strands.

### Supplementary References

- Adereth, Y., Champion, K.J., Hsu, T., and Dammai, V. (2005) Site-directed mutagenesis using Pfu DNA polymerase and T4 DNA ligase. *Biotechniques* **38**: 864, 866, 868.
- Bayly, R.C., Dagley, S., and Gibson, D.T. (1966) The metabolism of cresols by species of *Pseudomonas*. *Biochem. J.* **101**: 293-301.
- Keen, N.T., Tamaki, S., Kobayashi, D., and Trollinger, D. (1988) Improved broad-host-range plasmids for DNA cloning in gram-negative bacteria. *Gene* **70**: 191-197.
- Maniatis, T., Fritsch, E.F., and Sambrook, J. (1982) *Molecular cloning: a laboratory manual*. Cold Spring Harbor, New York: Cold Spring Harbor Laboratory.
- Oka, A., Sugisaki, H., and Takanami, M. (1981) Nucleotide sequence of the kanamycin resistance transposon Tn903. *J. Mol. Biol.* **147**: 217-226.
- Parales, R.E., Ontl, T.A., and Gibson, D.T. (1997) Cloning and sequence analysis of a catechol 2,3-dioxygenase gene from the nitrobenzene-degrading strain *Comamonas* sp. JS765. *J. Ind. Microbiol. Biotechnol.* **19**: 385-391.
- Prentki, P., and Krisch, H.M. (1984) In vitro insertional mutagenesis with a selectable DNA fragment. *Gene* **29**: 303-313.
- Pridmore, R.D. (1987) New and versatile cloning vectors with kanamycin-resistance marker. *Gene* **56**: 309-312.

**Table S1.**  $\beta$ -Galactosidase activity in JS42R-1 expressing NtdR variants after growth in the presence of benzoate derivatives

| Inducer <sup>a</sup> | Regulator |          |          |           |          |           |                |                         |  |  |  |
|----------------------|-----------|----------|----------|-----------|----------|-----------|----------------|-------------------------|--|--|--|
|                      | NtdR      | V74I     | L169H    | R189K     | S227P    | V232I     | S227P<br>V232I | R189K<br>S227P<br>V232I |  |  |  |
| None                 | 81 ± 32   | 95 ± 26  | 20 ± 5   | 54 ± 3    | 14 ± 4   | 139 ± 34  | 22 ± 7         | 11 ± 3                  |  |  |  |
| Ben                  | 470 ± 68  | 609 ± 82 | 47 ± 1   | 574 ± 47  | 12 ± 4   | 624 ± 84  | 19 ± 4         | 6 ± 2                   |  |  |  |
| 2HBen                | 499 ± 56  | 756 ± 82 | 459 ± 52 | 570 ± 32  | 419 ± 64 | 702 ± 72  | 617 ± 33       | 319 ± 49                |  |  |  |
| 3HBen                | 37 ± 21   | 46 ± 12  | 22 ± 1   | 32 ± 3    | 19 ± 2   | 81 ± 26   | 20 ± 0         | 9 ± 2                   |  |  |  |
| 4HBen                | 287 ± 36  | 375 ± 61 | 256 ± 23 | 346 ± 48  | 17 ± 6   | 445 ± 71  | 22 ± 5         | 10 ± 2                  |  |  |  |
| 2NBen                | 214 ± 38  | 364 ± 44 | 57 ± 1   | 402 ± 2   | 22 ± 2   | 359 ± 78  | 21 ± 8         | 9 ± 2                   |  |  |  |
| 3NBen                | 436 ± 93  | 448 ± 51 | 63 ± 3   | 1016 ± 41 | 22 ± 4   | 804 ± 87  | 39 ± 21        | 11 ± 3                  |  |  |  |
| 4NBen                | 346 ± 90  | 554 ± 49 | 19 ± 1   | 724 ± 79  | 19 ± 3   | 762 ± 58  | 100 ± 49       | 47 ± 14                 |  |  |  |
| 2ABen                | 497 ± 58  | 217 ± 5  | 22 ± 2   | 956 ± 73  | 20 ± 5   | 727 ± 62  | 25 ± 13        | 14 ± 4                  |  |  |  |
| 3ABen                | 132 ± 42  | 108 ± 10 | 22 ± 3   | 192 ± 35  | 20 ± 6   | 238 ± 66  | 19 ± 12        | 7 ± 2                   |  |  |  |
| 4ABen                | 303 ± 71  | 290 ± 32 | 31 ± 2   | 596 ± 34  | 21 ± 2   | 434 ± 61  | 18 ± 7         | 10 ± 2                  |  |  |  |
| 2ClBen               | 467 ± 25  | 566 ± 36 | 14 ± 4   | 989 ± 41  | 138 ± 31 | 859 ± 71  | 236 ± 59       | 81 ± 12                 |  |  |  |
| 3ClBen               | 413 ± 34  | 733 ± 26 | 17 ± 3   | 734 ± 64  | 19 ± 6   | 848 ± 75  | 24 ± 10        | 9 ± 2                   |  |  |  |
| 4ClBen               | 511 ± 60  | 675 ± 76 | 27 ± 1   | 790 ± 86  | 19 ± 1   | 796 ± 93  | 19 ± 6         | 12 ± 3                  |  |  |  |
| 25HBen               | 460 ± 81  | 530 ± 27 | 426 ± 52 | 485 ± 52  | 295 ± 31 | 864 ± 102 | 428 ± 55       | 201 ± 50                |  |  |  |
| 3MBen                | 407 ± 60  | 767 ± 59 | 96 ± 11  | 546 ± 57  | 14 ± 4   | 963 ± 101 | 20 ± 5         | 9 ± 4                   |  |  |  |
| 4IPBen               | 471 ± 39  | 680 ± 90 | 498 ± 65 | 496 ± 52  | 211 ± 28 | 1140 ± 86 | 448 ± 44       | 210 ± 65                |  |  |  |

<sup>a</sup>Full names for the chemical inducers are listed in Experimental Procedures. Standard deviations are indicated.

**Table S2.**  $\beta$ -Galactosidase activity in JS42R-1 expressing NagR variants after growth in the presence of benzoate derivatives

| Inducer <sup>a</sup> | Regulator |          |                                            |          |           |          |                |                         |
|----------------------|-----------|----------|--------------------------------------------|----------|-----------|----------|----------------|-------------------------|
|                      | NagR      | I74V     | H169L                                      | K189R    | P227S     | I232V    | P227S<br>I232V | K189R<br>P227S<br>I232V |
| None                 | 11 ± 3    | 12 ± 3   | 8 ± 4                                      | 7 ± 4    | 11 ± 5    | 11 ± 6   | 13 ± 8         | 29 ± 8                  |
| Ben                  | 11 ± 2    | 13 ± 1   |                                            | 7 ± 0    | 11 ± 4    | 4 ± 2    | 19 ± 4         | 31 ± 3                  |
| 2HBen                | 383 ± 47  | 291 ± 14 |                                            | 177 ± 47 | 481 ± 75  | 146 ± 49 | 377 ± 47       | 570 ± 73                |
| 3HBen                | 7 ± 1     | 13 ± 2   |                                            | 6 ± 3    | 8 ± 3     | 4 ± 1    | 11 ± 4         | 18 ± 2                  |
| 4HBen                | 247 ± 54  | 98 ± 7   |                                            | 25 ± 8   | 113 ± 24  | 91 ± 15  | 165 ± 16       | 290 ± 46                |
| 2NBen                | 9 ± 2     | 10 ± 2   |                                            | 8 ± 6    | 49 ± 20   | 7 ± 6    | 47 ± 17        | 83 ± 11                 |
| 3NBen                | 9 ± 3     | 14 ± 0   | No activity<br>with<br>tested<br>compounds | 6 ± 3    | 48 ± 17   | 5 ± 3    | 35 ± 16        | 98 ± 55                 |
| 4NBen                | 9 ± 2     | 11 ± 2   |                                            | 8 ± 9    | 9 ± 2     | 8 ± 7    | 17 ± 7         | 29 ± 11                 |
| 2ABen                | 14 ± 1    | 14 ± 2   |                                            | 6 ± 3    | 79 ± 29   | 35 ± 12  | 137 ± 12       | 219 ± 19                |
| 3ABen                | 10 ± 2    | 11 ± 0   |                                            | 8 ± 9    | 8 ± 3     | 6 ± 5    | 22 ± 6         | 26 ± 4                  |
| 4ABen                | 9 ± 3     | 12 ± 1   |                                            | 5 ± 3    | 8 ± 2     | 6 ± 3    | 20 ± 6         | 24 ± 10                 |
| 2CIBen               | 6 ± 3     | 9 ± 7    |                                            | 5 ± 4    | 9 ± 6     | 3 ± 2    | 11 ± 2         | 15 ± 2                  |
| 3CIBen               | 8 ± 6     | 14 ± 1   |                                            | 5 ± 3    | 66 ± 16   | 3 ± 2    | 27 ± 12        | 43 ± 15                 |
| 4CIBen               | 9 ± 7     | 13 ± 2   |                                            | 6 ± 4    | 99 ± 12   | 6 ± 3    | 39 ± 19        | 168 ± 21                |
| 25HBen               | 324 ± 39  | 203 ± 24 |                                            | 186 ± 59 | 291 ± 67  | 109 ± 34 | 350 ± 58       | 494 ± 63                |
| 3MBen                | 12 ± 3    | 12 ± 1   |                                            | 3 ± 3    | 45 ± 10   | 4 ± 1    | 84 ± 15        | 183 ± 47                |
| 4IPBen               | 392 ± 35  | 98 ± 7   |                                            | 95 ± 34  | 609 ± 117 | 82 ± 12  | 307 ± 26       | 566 ± 16                |

<sup>a</sup>Full names for the chemical inducers are listed in Experimental Procedures. Standard deviations are indicated.

**Table S3.**  $\beta$ -Galactosidase activity in JS42R-1 expressing NtdR variants after growth in the presence of benzoate analogs

| Inducer <sup>a</sup> | Regulator |          |          |          |         |          |                |                         |
|----------------------|-----------|----------|----------|----------|---------|----------|----------------|-------------------------|
|                      | NtdR      | V74I     | L169H    | R189K    | S227P   | V232I    | S227P<br>V232I | R189K<br>S227P<br>V232I |
| None                 | 81 ± 32   | 95 ± 26  | 20 ± 5   | 54 ± 3   | 14 ± 4  | 139 ± 34 | 22 ± 7         | 11 ± 3                  |
| MSal                 | 509 ± 101 | 650 ± 62 | 558 ± 63 | 535 ± 77 | 22 ± 12 | 596 ± 76 | 149 ± 22       | 124 ± 32                |
| PAA                  | 208 ± 51  | 389 ± 37 | 17 ± 3   | 743 ± 29 | 13 ± 1  | 322 ± 70 | 22 ± 8         | 10 ± 3                  |
| NA                   | 172 ± 43  | 135 ± 32 | 17 ± 7   | 97 ± 8   | 14 ± 4  | 191 ± 84 | 23 ± 11        | 11 ± 5                  |
| Ba                   | 115 ± 72  | 107 ± 16 | 13 ± 5   | 31 ± 2   | 15 ± 4  | 134 ± 19 | 24 ± 11        | 11 ± 2                  |
| 2HBa                 | 54 ± 41   | 70 ± 14  | 17 ± 4   | 23 ± 5   | 14 ± 2  | 116 ± 38 | 15 ± 7         | 11 ± 3                  |
| 2ABa                 | 55 ± 35   | 71 ± 3   | 24 ± 8   | 36 ± 7   | 12 ± 4  | 114 ± 41 | 18 ± 7         | 11 ± 0                  |
| 2NBa                 | 276 ± 41  | 460 ± 47 | 28 ± 12  | 165 ± 21 | 16 ± 3  | 511 ± 35 | 21 ± 2         | 11 ± 0                  |
| 3NBa                 | 196 ± 42  | 334 ± 17 | 19 ± 11  | 248 ± 36 | 24 ± 1  | 606 ± 33 | 72 ± 16        | 81 ± 9                  |
| 4NBa                 | 166 ± 39  | 336 ± 49 | 18 ± 1   | 112 ± 21 | 12 ± 4  | 405 ± 66 | 20 ± 5         | 12 ± 1                  |
| Bzl                  | 105 ± 49  | 203 ± 34 | 18 ± 3   | 482 ± 27 | 11 ± 5  | 598 ± 91 | 18 ± 8         | 10 ± 2                  |
| 3HBzl                | 108 ± 11  | 98 ± 16  | 19 ± 1   | 61 ± 27  | 18 ± 5  | 218 ± 14 | 19 ± 4         | 12 ± 2                  |
| 3NBzl                | 276 ± 57  | 307 ± 45 | 249 ± 34 | 605 ± 79 | 10 ± 7  | 955 ± 89 | 19 ± 5         | 11 ± 2                  |

<sup>a</sup>Full names for the chemical inducers are listed in Experimental Procedures. Standard deviations are indicated.

**Table S4.**  $\beta$ -Galactosidase activity in JS42R-1 expressing NagR variants after growth in the presence of benzoate analogs

| Inducer <sup>a</sup> | Regulator |          |             |          |           |          |                |                         |
|----------------------|-----------|----------|-------------|----------|-----------|----------|----------------|-------------------------|
|                      | NagR      | I74V     | H169L       | K189R    | P227S     | I232V    | P227S<br>I232V | K189R<br>P227S<br>I232V |
| None                 | 11 ± 3    | 12 ± 3   | 8 ± 4       | 7 ± 4    | 11 ± 5    | 11 ± 6   | 13 ± 8         | 29 ± 8                  |
| MSal                 | 712 ± 107 | 309 ± 29 |             | 205 ± 54 | 546 ± 164 | 268 ± 69 | 409 ± 15       | 569 ± 57                |
| PAA                  | 10 ± 2    | 17 ± 3   |             | 4 ± 4    | 12 ± 4    | 5 ± 1    | 17 ± 5         | 46 ± 11                 |
| NA                   | 13 ± 1    | 9 ± 0    |             | 6 ± 4    | 14 ± 3    | 23 ± 10  | 15 ± 3         | 42 ± 10                 |
| Ba                   | 11 ± 2    | 18 ± 2   | No activity | 5 ± 3    | 11 ± 3    | 7 ± 3    | 10 ± 2         | 31 ± 13                 |
| 2HBa                 | 23 ± 8    | 13 ± 3   | with        | 5 ± 3    | 17 ± 11   | 24 ± 13  | 45 ± 14        | 188 ± 28                |
| 2ABa                 | 10 ± 1    | 13 ± 1   | tested      | 4 ± 4    | 9 ± 4     | 13 ± 9   | 12 ± 4         | 27 ± 9                  |
| 2NBa                 | 12 ± 2    | 11 ± 3   | compounds   | 5 ± 5    | 12 ± 3    | 16 ± 10  | 44 ± 11        | 144 ± 27                |
| 3NBa                 | 11 ± 1    | 10 ± 0   |             | 5 ± 5    | 12 ± 3    | 14 ± 8   | 31 ± 6         | 62 ± 19                 |
| 4NBa                 | 11 ± 1    | 10 ± 1   |             | 5 ± 5    | 13 ± 3    | 14 ± 7   | 25 ± 10        | 29 ± 9                  |
| Bzl                  | 10 ± 1    | 12 ± 1   |             | 4 ± 3    | 10 ± 2    | 9 ± 4    | 12 ± 4         | 20 ± 5                  |
| 3HBzl                | 11 ± 1    | 14 ± 1   |             | 4 ± 3    | 11 ± 1    | 11 ± 6   | 12 ± 1         | 20 ± 6                  |
| 3NBzl                | 14 ± 4    | 13 ± 0   |             | 5 ± 6    | 13 ± 3    | 16 ± 4   | 11 ± 3         | 35 ± 2                  |

<sup>a</sup>Full names for the chemical inducers are listed in Experimental Procedures. Standard deviations are indicated.

**Table S5.**  $\beta$ -Galactosidase activity in JS42R-1 expressing NtdR variants after growth in the presence of benzenes and toluenes

| Inducer <sup>a</sup> | Regulator |          |          |          |         |            |                |                         |  |  |  |
|----------------------|-----------|----------|----------|----------|---------|------------|----------------|-------------------------|--|--|--|
|                      | NtdR      | V74I     | L169H    | R189K    | S227P   | V232I      | S227P<br>V232I | R189K<br>S227P<br>V232I |  |  |  |
| None                 | 81 ± 32   | 95 ± 26  | 20 ± 5   | 54 ± 3   | 14 ± 4  | 139 ± 34   | 22 ± 7         | 11 ± 3                  |  |  |  |
| Bz                   | 110 ± 16  | 90 ± 21  | 15 ± 10  | 60 ± 7   | 7 ± 2   | 94 ± 16    | 33 ± 2         | 13 ± 1                  |  |  |  |
| NB                   | 381 ± 96  | 323 ± 37 | 171 ± 22 | 519 ± 61 | 14 ± 3  | 515 ± 138  | 21 ± 8         | 13 ± 5                  |  |  |  |
| TNB                  | 162 ± 24  | 68 ± 5   | 17 ± 2   | 79 ± 4   | 13 ± 1  | 156 ± 42   | 22 ± 1         | 14 ± 2                  |  |  |  |
| AB                   | 98 ± 30   | 96 ± 28  | 21 ± 5   | 32 ± 6   | 8 ± 6   | 102 ± 18   | 19 ± 4         | 9 ± 3                   |  |  |  |
| CIB                  | 79 ± 10   | 93 ± 25  | 24 ± 3   | 39 ± 9   | 13 ± 1  | 121 ± 18   | 19 ± 4         | 9 ± 2                   |  |  |  |
| Tol                  | 71 ± 38   | 103 ± 3  | 16 ± 2   | 34 ± 7   | 13 ± 5  | 154 ± 72   | 20 ± 3         | 9 ± 2                   |  |  |  |
| 2AT                  | 105 ± 32  | 111 ± 19 | 24 ± 4   | 52 ± 9   | 14 ± 4  | 138 ± 48   | 16 ± 3         | 9 ± 3                   |  |  |  |
| 3AT                  | 185 ± 32  | 93 ± 28  | 20 ± 12  | 41 ± 6   | 13 ± 3  | 136 ± 40   | 15 ± 4         | 10 ± 3                  |  |  |  |
| 4AT                  | 104 ± 20  | 111 ± 26 | 24 ± 5   | 62 ± 13  | 12 ± 3  | 169 ± 30   | 18 ± 1         | 10 ± 4                  |  |  |  |
| 2NT                  | 681 ± 79  | 700 ± 77 | 176 ± 0  | 474 ± 47 | 16 ± 4  | 607 ± 44   | 20 ± 5         | 27 ± 18                 |  |  |  |
| 3NT                  | 523 ± 62  | 606 ± 86 | 227 ± 83 | 421 ± 66 | 14 ± 3  | 660 ± 54   | 24 ± 3         | 23 ± 7                  |  |  |  |
| 4NT                  | 686 ± 74  | 581 ± 42 | 259 ± 79 | 548 ± 62 | 20 ± 13 | 952 ± 69   | 194 ± 4        | 28 ± 10                 |  |  |  |
| 24DNT                | 687 ± 87  | 374 ± 34 | 250 ± 27 | 484 ± 32 | 13 ± 7  | 713 ± 71   | 24 ± 2         | 15 ± 6                  |  |  |  |
| 26DNT                | 721 ± 92  | 410 ± 75 | 356 ± 25 | 813 ± 74 | 11 ± 6  | 728 ± 111  | 24 ± 7         | 11 ± 2                  |  |  |  |
| TNT                  | 215 ± 20  | 264 ± 6  | 364 ± 34 | 209 ± 13 | 14 ± 4  | 279 ± 5    | 20 ± 4         | 15 ± 1                  |  |  |  |
| 2ADNT                | 1001 ± 20 | 533 ± 77 | 46 ± 14  | 605 ± 71 | 13 ± 7  | 1030 ± 117 | 20 ± 3         | 13 ± 1                  |  |  |  |
| 4ADNT                | 599 ± 76  | 641 ± 54 | 140 ± 23 | 469 ± 46 | 10 ± 6  | 506 ± 31   | 16 ± 2         | 13 ± 1                  |  |  |  |
| 2CNB                 | 827 ± 59  | 901 ± 74 | 319 ± 14 | 326 ± 10 | 14 ± 12 | 566 ± 131  | 42 ± 12        | 14 ± 1                  |  |  |  |
| 3CNB                 | 361 ± 48  | 448 ± 39 | 84 ± 4   | 172 ± 8  | 11 ± 8  | 449 ± 29   | 34 ± 13        | 16 ± 6                  |  |  |  |
| 4CNB                 | 941 ± 85  | 348 ± 7  | 330 ± 41 | 725 ± 81 | 22 ± 15 | 704 ± 108  | 179 ± 25       | 72 ± 19                 |  |  |  |
| 3CAB                 | 157 ± 68  | 117 ± 11 | 19 ± 3   | 54 ± 5   | 11 ± 8  | 181 ± 54   | 27 ± 4         | 14 ± 2                  |  |  |  |
| 4CAB                 | 36 ± 31   | 84 ± 26  | 20 ± 0   | 50 ± 4   | 11 ± 6  | 136 ± 8    | 24 ± 3         | 14 ± 1                  |  |  |  |

<sup>a</sup>Full names for the chemical inducers are listed in Experimental Procedures. Standard deviations are indicated.

**Table S6.**  $\beta$ -Galactosidase activity in JS42R-1 expressing NagR variants after growth in the presence of benzenes and toluenes

| Inducer <sup>a</sup> | Regulator |        |                                            |         |          |          |                |                         |
|----------------------|-----------|--------|--------------------------------------------|---------|----------|----------|----------------|-------------------------|
|                      | NagR      | I74V   | H169L                                      | K189R   | P227S    | I232V    | P227S<br>I232V | K189R<br>P227S<br>I232V |
| None                 | 11 ± 3    | 12 ± 3 | 8 ± 4                                      | 7 ± 4   | 11 ± 5   | 11 ± 6   | 13 ± 8         | 29 ± 8                  |
| Bz                   | 13 ± 2    | 12 ± 2 |                                            | 19 ± 4  | 6 ± 3    | 17 ± 3   | 14 ± 5         | 36 ± 18                 |
| NB                   | 13 ± 3    | 10 ± 3 |                                            | 7 ± 4   | 74 ± 26  | 51 ± 13  | 111 ± 34       | 245 ± 33                |
| TNB                  | 14 ± 2    | 11 ± 0 |                                            | 6 ± 4   | 12 ± 2   | 13 ± 1   | 24 ± 12        | 33 ± 12                 |
| AB                   | 12 ± 3    | 12 ± 4 |                                            | 4 ± 3   | 9 ± 0    | 12 ± 4   | 10 ± 3         | 28 ± 9                  |
| CIB                  | 10 ± 3    | 11 ± 5 |                                            | 4 ± 3   | 9 ± 1    | 21 ± 10  | 19 ± 9         | 21 ± 5                  |
| Tol                  | 12 ± 3    | 11 ± 0 |                                            | 5 ± 3   | 10 ± 1   | 20 ± 6   | 14 ± 3         | 19 ± 6                  |
| 2AT                  | 10 ± 6    | 10 ± 2 | No activity<br>with<br>tested<br>compounds | 6 ± 2   | 10 ± 1   | 25 ± 20  | 14 ± 3         | 24 ± 11                 |
| 3AT                  | 9 ± 6     | 10 ± 3 |                                            | 5 ± 2   | 10 ± 1   | 13 ± 9   | 13 ± 2         | 24 ± 13                 |
| 4AT                  | 14 ± 2    | 10 ± 3 |                                            | 5 ± 3   | 10 ± 1   | 12 ± 8   | 9 ± 2          | 29 ± 20                 |
| 2NT                  | 16 ± 1    | 11 ± 3 |                                            | 7 ± 3   | 145 ± 38 | 177 ± 30 | 151 ± 39       | 245 ± 38                |
| 3NT                  | 16 ± 2    | 13 ± 4 |                                            | 7 ± 4   | 58 ± 20  | 14 ± 5   | 96 ± 8         | 294 ± 43                |
| 4NT                  | 12 ± 1    | 14 ± 4 |                                            | 7 ± 4   | 50 ± 15  | 17 ± 5   | 112 ± 38       | 282 ± 37                |
| 24DNT                | 19 ± 5    | 12 ± 4 |                                            | 6 ± 5   | 46 ± 18  | 15 ± 3   | 36 ± 12        | 372 ± 37                |
| 26DNT                | 13 ± 7    | 12 ± 4 | 7 ± 5                                      | 85 ± 23 | 14 ± 7   | 224 ± 49 | 650 ± 70       |                         |
| TNT                  | 9 ± 1     | 12 ± 1 | 7 ± 4                                      | 15 ± 3  | 16 ± 4   | 19 ± 7   | 69 ± 4         |                         |
| 2ADNT                | 13 ± 3    | 12 ± 1 | 6 ± 4                                      | 59 ± 26 | 62 ± 18  | 48 ± 9   | 173 ± 31       |                         |
| 4ADNT                | 10 ± 0    | 10 ± 1 | 5 ± 4                                      | 65 ± 17 | 50 ± 9   | 98 ± 51  | 327 ± 17       |                         |
| 2CNB                 | 11 ± 1    | 10 ± 2 | 5 ± 4                                      | 18 ± 11 | 43 ± 18  | 147 ± 39 | 369 ± 40       |                         |
| 3CNB                 | 15 ± 6    | 10 ± 2 | 7 ± 3                                      | 72 ± 17 | 13 ± 6   | 96 ± 21  | 302 ± 17       |                         |
| 4CNB                 | 10 ± 2    | 11 ± 1 | 6 ± 4                                      | 13 ± 1  | 12 ± 5   | 134 ± 32 | 383 ± 24       |                         |
| 3CAB                 | 11 ± 3    | 14 ± 5 | 7 ± 3                                      | 14 ± 4  | 13 ± 2   | 10 ± 4   | 36 ± 5         |                         |
| 4CAB                 | 11 ± 2    | 14 ± 2 | 7 ± 3                                      | 16 ± 5  | 11 ± 3   | 12 ± 4   | 34 ± 7         |                         |

<sup>a</sup>Full names for the chemical inducers are listed in Experimental Procedures. Standard deviations are indicated.



**Table S7.**  $\beta$ -Galactosidase activity in JS42R-1 expressing NtdR variants after growth in the presence of phenols and other compounds.

| Inducer <sup>a</sup> | Regulator |          |          |          |        |           |                |                         |  |  |  |
|----------------------|-----------|----------|----------|----------|--------|-----------|----------------|-------------------------|--|--|--|
|                      | NtdR      | V74I     | L169H    | R189K    | S227P  | V232I     | S227P<br>V232I | R189K<br>S227P<br>V232I |  |  |  |
| None                 | 81 ± 32   | 95 ± 26  | 20 ± 5   | 54 ± 3   | 14 ± 4 | 139 ± 34  | 22 ± 7         | 11 ± 3                  |  |  |  |
| Phe                  | 51 ± 23   | 106 ± 14 | 19 ± 0   | 62 ± 16  | 10 ± 6 | 141 ± 9   | 24 ± 2         | 12 ± 1                  |  |  |  |
| 2NP                  | 234 ± 28  | 333 ± 27 | 484 ± 2  | 455 ± 38 | 16 ± 7 | 236 ± 42  | 24 ± 8         | 16 ± 1                  |  |  |  |
| 3NP                  | 340 ± 90  | 195 ± 14 | 219 ± 20 | 233 ± 51 | 13 ± 7 | 389 ± 15  | 28 ± 6         | 13 ± 1                  |  |  |  |
| 4NP                  | 767 ± 108 | 354 ± 32 | 249 ± 69 | 503 ± 66 | 20 ± 3 | 605 ± 69  | 37 ± 3         | 19 ± 1                  |  |  |  |
| 24DNP                | 802 ± 151 | 448 ± 21 | 418 ± 64 | 385 ± 21 | 15 ± 4 | 641 ± 49  | 33 ± 4         | 19 ± 4                  |  |  |  |
| 2AP                  | 77 ± 20   | 80 ± 12  | 23 ± 6   | 43 ± 13  | 19 ± 7 | 102 ± 23  | 26 ± 9         | 13 ± 2                  |  |  |  |
| Cat                  | 58 ± 7    | 65 ± 18  | 24 ± 3   | 41 ± 3   | 11 ± 0 | 151 ± 55  | 22 ± 1         | 14 ± 4                  |  |  |  |
| 3MC                  | 125 ± 17  | 100 ± 18 | 23 ± 0   | 53 ± 18  | 12 ± 4 | 109 ± 31  | 22 ± 6         | 13 ± 0                  |  |  |  |
| 4MC                  | 141 ± 6   | 63 ± 2   | 25 ± 1   | 61 ± 23  | 7 ± 1  | 154 ± 80  | 19 ± 0         | 12 ± 2                  |  |  |  |
| Atz                  | 201 ± 50  | 302 ± 39 | 21 ± 1   | 291 ± 33 | 10 ± 3 | 406 ± 72  | 20 ± 2         | 13 ± 1                  |  |  |  |
| CA                   | 72 ± 13   | 119 ± 35 | 21 ± 0   | 54 ± 8   | 11 ± 5 | 208 ± 16  | 26 ± 4         | 12 ± 1                  |  |  |  |
| Nap                  | 82 ± 14   | 108 ± 6  | 25 ± 3   | 268 ± 34 | 7 ± 2  | 492 ± 121 | 19 ± 3         | 8 ± 1                   |  |  |  |
| 1N Nap               | 226 ± 27  | 347 ± 26 | 37 ± 4   | 436 ± 75 | 8 ± 3  | 159 ± 35  | 29 ± 16        | 21 ± 13                 |  |  |  |

<sup>a</sup>Full names for the chemical inducers are listed in Experimental Procedures. Standard deviations are indicated.

**Table S8.**  $\beta$ -Galactosidase activity in JS42R-1 expressing NagR variants after growth in the presence of phenols and other compounds.

| Inducer <sup>a</sup> | Regulator |        |             |        |          |         |                |                         |
|----------------------|-----------|--------|-------------|--------|----------|---------|----------------|-------------------------|
|                      | NagR      | I74V   | H169L       | K189R  | P227S    | I232V   | P227S<br>I232V | K189R<br>P227S<br>I232V |
| None                 | 11 ± 3    | 12 ± 3 | 8 ± 4       | 7 ± 4  | 11 ± 5   | 11 ± 6  | 13 ± 8         | 29 ± 8                  |
| Phe                  | 11 ± 0    | 15 ± 3 |             | 6 ± 4  | 13 ± 2   | 14 ± 10 | 10 ± 1         | 20 ± 6                  |
| 2NP                  | 35 ± 17   | 10 ± 4 |             | 8 ± 6  | 390 ± 44 | 97 ± 14 | 403 ± 58       | 632 ± 72                |
| 3NP                  | 11 ± 0    | 12 ± 1 |             | 6 ± 4  | 101 ± 26 | 11 ± 4  | 135 ± 35       | 281 ± 32                |
| 4NP                  | 13 ± 1    | 13 ± 2 |             | 6 ± 7  | 148 ± 39 | 11 ± 4  | 125 ± 50       | 437 ± 60                |
| 24DNP                | 14 ± 3    | 14 ± 2 | No activity | 7 ± 1  | 150 ± 16 | 11 ± 7  | 213 ± 55       | 463 ± 30                |
| 2AP                  | 12 ± 2    | 9 ± 0  | with        | 9 ± 2  | 9 ± 4    | 19 ± 2  | 15 ± 6         | 20 ± 4                  |
| Cat                  | 9 ± 3     | 12 ± 2 | tested      | 18 ± 7 | 10 ± 1   | 20 ± 8  | 16 ± 1         | 34 ± 3                  |
| 3MC                  | 13 ± 3    | 8 ± 1  | compounds   | 20 ± 9 | 5 ± 4    | 12 ± 3  | 18 ± 18        | 33 ± 2                  |
| 4MC                  | 16 ± 3    | 8 ± 0  |             | 21 ± 9 | 9 ± 3    | 18 ± 1  | 9 ± 3          | 30 ± 5                  |
| Atz                  | 11 ± 3    | 9 ± 2  |             | 5 ± 5  | 11 ± 5   | 9 ± 5   | 10 ± 2         | 20 ± 4                  |
| CA                   | 11 ± 2    | 10 ± 2 |             | 5 ± 3  | 11 ± 6   | 10 ± 6  | 11 ± 2         | 19 ± 5                  |
| Nap                  | 10 ± 5    | 8 ± 0  |             | 18 ± 1 | 40 ± 19  | 28 ± 6  | 16 ± 6         | 108 ± 0                 |
| 1Nnap                | 14 ± 4    | 11 ± 1 |             | 21 ± 8 | 41 ± 10  | 24 ± 6  | 85 ± 36        | 443 ± 63                |

<sup>a</sup>Full names for the chemical inducers are listed in Experimental Procedures. Standard deviations are indicated.

**TABLE S9.** Oligonucleotide primers used in this study

| Name       | Sequence <sup>a</sup>                        | Restriction Sites |
|------------|----------------------------------------------|-------------------|
| ntdR-F1    | GCGGG <u>AAGCTT</u> ATGGATCTGCGCGACATCGACTTG | HindIII           |
| ntdR-F1    | GGCGTCTAGATTATGCTTCAGAGAAAAGCTCGACG          | XbaI              |
| nagR H169L | CAGCGGCGCCTCTTCCGCC <b>TCC</b> GCTACGTATGC   | EarI              |
| H169L REV  | GAAGAATCCGGTCTGTAGCTCTGGCAG                  |                   |
| nagR K189R | CCCATGAGCCTGAG <b>GG</b> CAGTTCAGTGAACCTGG   | Bsu361            |
| K189R REV  | GGATTTGGCGCTTGGATGGTCCTTGCGGAACATGC          |                   |
| nagR P227S | ATGCGGCTGGTGGT <b>CTC</b> GCATTTTCATTGCG     | BsaI              |
| P227S REV  | GCGCCTTTTGATGCCTGCGCGTTCGAGCAGGCC            |                   |
| nagR I232V | CGCATTTTCATTGCG <b>GTCGGGCC</b> CATTCTGCACAG | ApaI              |
| I232V REV  | GCACCACCAGCCGCATGCGCCTTTTGATGCCTG            |                   |
| ntdR L169H | CAGCGGCGCCTCTTCCGCC <b>ACC</b> GCTACGTATGC   | EarI              |
| H169L REV  | GAAGAATCCGGTCTGTAGCTCTGGCAG                  |                   |
| ntdR R189K | CCCATGAGCCT <b>TAAG</b> CAGTTCAGTGAATTG      | AflIII            |
| R189K REV  | GGATTTGGCGCTTGGATGGTCCTTGCGGAACATGC          |                   |
| ntdR S227P | AGGCGCATGCGACTAGTGGTGCCGCATTTTCATTGCG        | SpeI              |
| S227P REV  | TTTGATGCCTGCGCGTTCAAG                        |                   |
| ntdR V232I | TTTCATTGCG <b>ATC</b> GGCCCCAT               | DpnI              |
| V232I REV  | TGCGACACCACCAGTCGCATG                        |                   |
| nitroAc    | CCACCCAACCCAATCACTACC                        |                   |
| nitroAd    | ATCACGAATGCCCGCCATCCA                        |                   |
| ctdE1F     | GTTTCTAGAAATGGGTGTGATGCGCATCGGGCACG          | XbaI              |
| ctdE1R     | GGTAAGCTTT <b>CAGG</b> TATAGACGTCCGTGAAGGAC  | HindIII           |

<sup>a</sup> Changed bases are in bold italics; underlining shows introduced restriction sites.
